# Supplementary material for: Quantitative analysis of flow observed in Au+Au collisions at the AGS
Source: MDPI journal article supplement (doi:10.3390/jcdd9040091), 1995-04-01
Supplement: s1 [file s1]

**Supplementary Table S1 Electroanatomic parameters of the ablation sites**

|                                                          | PANO View group | Control group | P value |
|----------------------------------------------------------|-----------------|---------------|---------|
| Distance between ablation sites and *the His bundle (mm) | 12.4 ± 3.5      | 12.3 ± 4.4    | 0.785   |
| Distance between ablation sites and the CSo (mm)         | 17.2 ± 3.1      | 15.6 ± 3.2    | 0.001*  |
| A/V ratio                                                | 0.3 ± 0.3       | -             | -       |

CSo = coronary sinus ostium; PANO View = Panoramic View.

\*: the site with the largest His electrogram
