# Supplementary material for: Quantitative analysis of flow observed in Au+Au collisions at the AGS
Source: MDPI journal article supplement (doi:10.3390/jcdd9040091), 1995-04-01
Supplement: s1 [file s1]

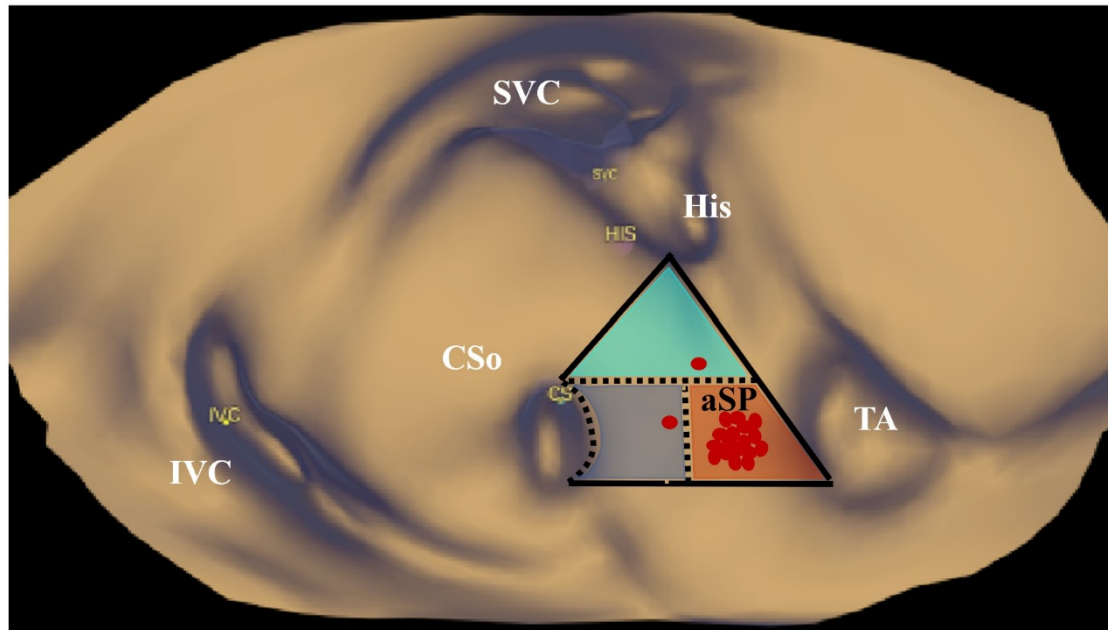

**Supplementary Figure S1 Ablation sites distributions of PANO View group.** Red dots represent ablation points. aSP = adaptive slow-pathway; CSo = coronary sinus ostium; His= His bundle electrogram; IVC=inferior vena cava; PANO View = Panoramic View; SVC = superior vena cava; TA = tricuspid annulus.
