# Supplementary material for: Slow-Pathway Visualization by Using Panoramic View: A Novel Ablation Technique for Ablation of Atrioventricular Nodal Reentrant Tachycardia
Source: J Cardiovasc Dev Dis. 2022 Mar 22;9(4):91. doi: 10.3390/jcdd9040091 (PMC9026770; doi:10.3390/jcdd9040091)
Supplement: Supplementary file 1 [file jcdd-09-00091-s001.zip]

Archive with 4 entries (4 files):
- Supplementary Figure S1.pdf
- Supplementary Table S1.pdf
- Supplementary Video S1.mp4
- Supplemetary Video S2.mp4
